# Supplementary material
Source: PubMed Central journal article supplement (PMC1083879)
Supplement: embor431-s1.pdf [file embor431-s1.pdf]

## SUPPLEMENTARY MATERIAL

Quantitative analysis of northern blotting

|       |       | Tunicamycin 5ug / ml |     |     |     |      |
|-------|-------|----------------------|-----|-----|-----|------|
| Time  |       | 0                    | 2   | 4   | 6   | 14 h |
| EDEM  | 6 k   | 1.0                  | 1.4 | 3.1 | 3.4 | 4.4  |
|       | 2.4 k | 1.0                  | 1.1 | 1.7 | 2.2 | 4.6  |
| GRP78 |       | 1.0                  | 1.6 | 5.2 | 7.2 | 9.7  |

|                      |       | 2-Deoxyglucose 12.5 mM |     |     | 2-Deoxyglucose 12 h |     |      |        |
|----------------------|-------|------------------------|-----|-----|---------------------|-----|------|--------|
| Time / concentration |       | 0                      | 2   | 4 h | 0                   | 0.5 | 1.25 | 5.0 mM |
| DEDM                 | 6 k   | 1.0                    | 0.6 | 1.7 | 1.0                 | 3.4 | 3.3  | 3.6    |
|                      | 2.4 k | 1.0                    | 1.0 | 2.0 | 1.0                 | 3.4 | 3.9  | 4.7    |
| GRP78                |       | 1.0                    | 1.9 | 5.9 | 1.0                 | 6.7 | 6.8  | 9.8    |
